# Supplementary material for: Effects of a Peer-Run Course on Recovery From Serious Mental Illness: A Randomized Controlled Trial
Source: Atypon-hosted journal article supplement (doi:10.1176/appi.ps.201000450), 2012-01-01
Supplement: pss6301_54_ds.pdf [file pss6301_54_ds.pdf]

**APPENDIX:**

**Effects of a Peer-Run Course on Recovery From Serious Mental Illness: A Randomized Controlled Trial**

| Supp T1: Results of mixed modeling analyses testing the effect of the intervention on the four key elements of recovery and loneliness |                      |         |             |                      |         |              |                      |         |              |                       |         |             |                      |         |             |
|----------------------------------------------------------------------------------------------------------------------------------------|----------------------|---------|-------------|----------------------|---------|--------------|----------------------|---------|--------------|-----------------------|---------|-------------|----------------------|---------|-------------|
|                                                                                                                                        | Empowerment          |         |             | Hope                 |         |              | Quality of life      |         |              | Self-efficacy beliefs |         |             | Loneliness           |         |             |
|                                                                                                                                        | B or $\chi^2_{(df)}$ | p-value | 95% CI      | B or $\chi^2_{(df)}$ | p-value | 95% CI       | B or $\chi^2_{(df)}$ | p-value | 95% CI       | B or $\chi^2_{(df)}$  | p-value | 95% CI      | B or $\chi^2_{(df)}$ | p-value | 95% CI      |
| effect of interv                                                                                                                       | $\chi^2_{(3)}=9.74$  | .021    |             | $\chi^2_{(3)}=8.13$  | .043    |              | $\chi^2_{(3)}=6.20$  | .10     |              | $\chi^2_{(3)}=8.37$   | .039    |             | $\chi^2_{(3)}=.30$   | .96     |             |
| a= T3-T2                                                                                                                               | B= .11               | .032    | .010 to .21 | B= .15               | <.001   | .067 to .23  | B= .14               | .12     | -.035 to .31 | B= .19                | .020    | .030 to .35 | B= -.16              | .53     | -.67 to .34 |
| b= T4-T2                                                                                                                               | B= .14               | .002    | .055 to .22 | B= .087              | .13     | -.026 to .20 | B= .29               | .002    | .11 to .46   | B= .19                | .017    | .035 to .34 | B= -.076             | .77     | -.59 to .44 |
| a=b                                                                                                                                    | $\chi^2_{(1)}=.58$   | .45     |             | $\chi^2_{(1)}=1.11$  | .29     |              | $\chi^2_{(1)}=.11$   | .078    |              | $\chi^2_{(1)}=.00$    | 1.00    |             | $\chi^2_{(1)}=.13$   | .74     |             |
| (a+b)/2                                                                                                                                | B= .13               | .002    | .051 to .22 | B= .13               | <.001   | .057 to .21  | B= .20               | .011    | .047 to .35  | B= .19                | .004    | .064 to .31 | B= -.12              | .75     | -.56 to .32 |

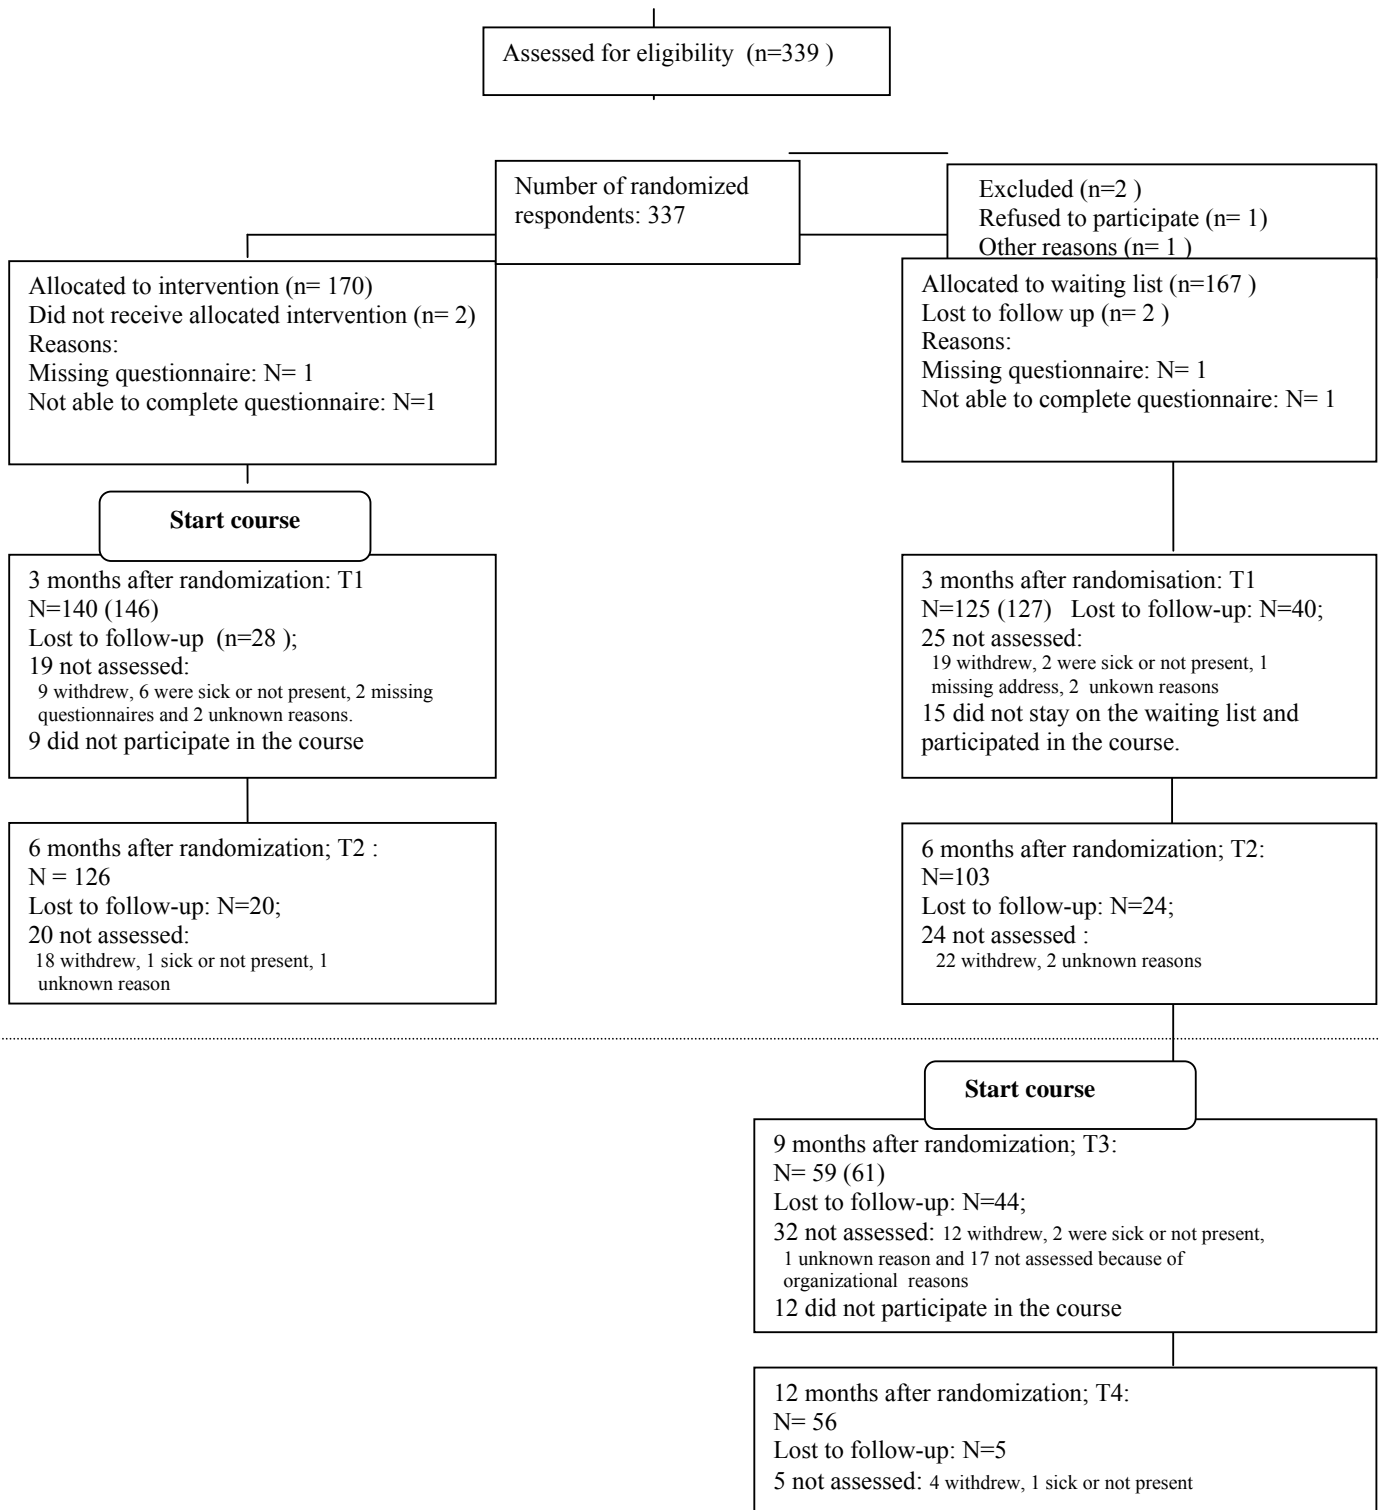

**Fig. 1** Flow chart of respondent numbers at each moment; the assessments at T3 and T4 below the dotted line were for additional information
